# Supplementary material
Source: PubMed Central journal article supplement (PMC4285749)
Supplement: pr500809b_si_001.pdf [file pr500809b_si_001.pdf]

Supplemental File 1. Sequences of proteins derived from ESTs, contigs, or PCR products from 'Butte 86' that were included in the "SuperWheat" database (Version#140828).

>BU\_Gamma#1

MKTLLILITIIAVALTTTTANIQVDPVSGVQVWPQQQPPFPQQPQQIFPQQPQTFPHQPO  
QAFPPQQPQTFPHQPPQQFPQQPQQPFPQQPQQQFPQQPQQPFPQQPQQQFPQQPQQ  
QQPFPQQPQLPFPQQPQQPFPQQPQQPFPQLQQPQQPLPQQPQQPFPQQQQPLI  
QPYLQQQMNPCKNYLLQQCNVSLVSSLVSMILPRSDCKVMRQQCCQQLAQIPQQQLCAA  
IHGVVHSIIMQQEQQQQQQQQGIQIMRPLFQLVQGGI IQPQQPAQLEVIRSLVLTLP  
TMCNVFVPEECSTTKAPFASIVADIGGQ

>BU\_Gamma#2

MKTLLILITILAMAITIGTANIQVDPVSGVQVWLQQQLVLPQLQQPLSQPPQTFPQQPQTFP  
HQPQQQVPQQPQQPFPQLPQQPFPQQPQQPFPQTQQPQQPFPQQPQQPFPQTQQPQQPFP  
PQQPQQPFPQTQQPQQPFPQLQQPQQPFPQQPQQQLPQQPQQPQQSFPQQQSF IQPSLQQQ  
LNPCKNILLQQCKPASLVSSLWSIIWPQSDCQVMRQQCCQQLAQIPQQQLCAA IHSVVHS  
IIMQQQQQQQQQQGMHIFLPLSQQQQVGGSLVQGGI IQPQQPAQLEAIRSLVLTLP  
MCNVYVPECSIMRAPFASIVAGIGGQ

>BU\_Gamma#3

MKTLLILITILAMATTIATANMQVDPVSGVQVWPQQQPPFPQQPQQFCQQPQRTIPQPHQTFH  
HQPQQTFPQQPQQTYPHQPPQQFPQTQQPQQPFPQQPQQTFPQQPQLPFPQQPQQPFPQQ  
PQQPFPQSQQPQQPFPQQPQQFPQQPQQSFPQQQQPAIQSFLQQQMNPCKNLLQQCN  
HVSLSVSSLVSIILPRSDCQVMQQCCQQLAQIPQQQLCAA IHSVAHSIIMQQEQQQGVTI  
LRPLFQLAQGLGIIQPQQPAQLEGIRSLVLTLP TMCNVYVPPNCSTINVPYANIDAGIG  
GQ

>BU\_Gamma#4

MKTLLIVTILAMATTIATANMQVDPGYQVHWPQQQPPFPQQPQQFCQQPQQTIPQPHQTFH  
HQPQQTFPQQPQQTYPHQPPQQFPQTQQPQQPFPQQPQQTFPQQPQLPFPQQPQQPFPQQ  
PQQPFPQSQQPQQPFPQQPQQFLQPQQPQQSFPQQQQPLIQLSLQQQMNPCKNLLQQCN  
PVSLSVSSLISMILPRSDCQVMQQCCQQLAQIPQQQLCAA IHSVVHSIIMQQEQRQGVQI  
RRPLFQLVQGGI IQPQQPAQLEVIRSLVLTLP TMCNVYVSPDCSTINAPFASIVVGIG  
GQ

>BU\_Gamma#5

MKTLLILITILAMAITISTANMQVDPVSGVQVWPQQQLVLPQQPQLSQPPQQAFPPQQPQTFP  
HQPQQQVPQQPQQPFPQLPQQAFPPQQPQQPFPQTQQPQQPFPQQPQQPFPQTQQPQQPFP  
PQQPQQPFPQQPQQPFPQTQQPQQPFPQQPQQPFPQTQQPQQPFPQFQQPHQPFHQPQQQ  
FPQQPQQPQQSFPQQQRPF IQPSLQQRLNPCKNILLQQCKPASLVSSLWSIIWPQSDCQVM  
QQCCQELAQIPQQQLCAA IHSVVHSIIVQQQQQQQQQQQQQQGMHILLPLSQQQQLGQ  
GTLVQGGI IQPQQLAQLEAIRSLVLTLP TMCNVYVPECSIIRAPFASIVAGIGGQ

>BU\_Gamma#6

MKTFLILTILAMATTIATANMQVDPVSGVQVWPQQQPPFRQPQQPFYQQPQQTFPQQPQQAF  
HQPQQQFPQQPQQPQQFPQQPQQPFPQQPQQALPFPQQPQQPFPQQPQQPFPQSQQ  
PQQPFPQQPQQSFPQQQQPLIQPYLQQQMNPCKNYLLQQCNVSLVSSLVSMILPRSD  
CQVMQQCCQQLAQIPRQLCAA IHSVVHSIVMQQEQQQGIQILRPLFQLVQGGI IQPQ  
QPAQYEVIRSLVLTLPNMCNVYVRPDCSTINAPFASIVAGISGQ

>BU\_Gamma#7

MKTLLILITILAMAITIATANMQVDPVSGVQVWPQQQPPFPQLPHQPFSSQPQQIFPQQPQTFP  
HQPQQQFPQQPQQPQQFLQPRQFPQQPQQPYPQQPQQPFPQTQQPQQPFPQSQQPQQPFP  
PQQPQQPQQSFPQQQPSLIQQSLQQQLNPCKNLLQQCKPVSLSVSSLWSIIILPPSDCQVMR  
QQCCQQLAQIPQQQLCAA IHSVVHSIIMQQEQQEQLQGVQILVPLSQQQQVGGIILVQGG  
GI IQPQQPAQLEVIRSLVLTLP TMCNVYVPPYCSTIRAPFASIVASIGGQ

>BU\_Gamma#8



>BU\_Alpha#6

MKTFLIISLLAIIVATTATTAVRVPVPQLQPQNPSLQQPQEQVPLVQQQQFPGQQQTFPPQ  
QPYPQPQPFPAQQPYPQPQLFPQPQFPFPQLPYPQPQFPFPQPYPQPQTQHLQPQQPIS  
QQQAQQQQQQQQQQQILQQILQQQLIPCRDVIVLQQHNIHAHSSQVLQQSSYQVLQQLC  
CQQLRQIPEQSRCQAINNVVHAIILHQQQQQQGQHQQSSQVSYQQPQQQYPSGQGSFQPS  
QQNPQAQGFVQPQHL

>BU\_Alpha#8

MKTFLILALLAIIVATTATTAVRVPVPQLQPQNPSQQQPQEQVPLVQQQQFPGQQQQFPPQ  
QPYPQPQPFPSQQPYLQLQPFQPQFPFPQLPYPQPQSFPPQPYPQQQPQYLQPQQPIS  
QQQAQQQQQQQQQQQQQQQQQILQQILQQQLIPCRDVVLQQHNIHAHASSQVLQQSTYQLLQQ  
LCCQQLLQIPEQSRCQAIHNVVAHAIIMHQQQQQQQEQQQQLQQQQQQQLHQQRQQPSSQV  
SFQQPQQQYPSQVSVFQPSQLNPPQAQGSVQPQQLPQFAEIRNLALQMLPAMCNVYIPPHC  
STTIAPFGIFGTN

>BU\_Alpha#9

QPYPQPQLFPQPQFPFPQLPYPKQPFPFPQPYPQPQTQHLQPQQPISQQQAQQQQQQQQ  
QILQQILQQILQQQQQLIPCRDVIVLQLHNIHAHSSQVLQQSSYQVLQQLCQQLWQIPEL  
SRCQAIHNVVHAIILHQQQQQQQEQEQHQPSQVSYQQPQQQYPSGQGSFQPSQQNPQAQG  
FVQPQRLPQLKEIRNLALQTLPAMCNVYIPPYCSTTIAPFGIFGTN

>BU\_Alpha#10

MKTFLILALLAIIVATTATTAVRVPVPQLQLQNPSQQQPQEQVPLVQEQQFPGQQQPFPPQ  
QPYPQPQPFPSQQPYLQLQPFQPQLPYPQPQFPRPQPYPQPQPQYSQPQQPISQQQQQ  
QQQQQQQQQQQILQQILQQQLIPCRDVVLQQHNIHAHGSSQVLQESTYQLVQQLCCQQLWQI  
PEQSRCQAIHNVVHAIILHQQHSHHHHQQQQQQQQPLSQVSVFQQPQQQYPSGQGSFQPSQ  
QNPQAQGSFQPPQLPQFAEIRNLALQTLPAMCNVYIPPYCTIAPFGIFGTN

>BU\_Alpha#11

MKTFLIISLLAIIVATTATTAVRVPVPQLQPQNPSLQQPQEQVPLVQQQQFPGQQQTFPPQ  
QPYPQPQPFPGQQPYPQPQLFPQPQFPFPQLPYPQPQFPFPQPYPQPQTTHHLQPQQPIS  
QQQVQQQQQQQQQQQQQQQQQQQQQQQQQLLQQQILQQILQQQLIPCRDVIVLQQHNIHAH  
SSQVLQQSSYQVLQQLCQQLRLIPEQSRCQAIHNVVHAIILHQQQQQQQQQQQQQQQGQH  
QPSSQVSYQQPQQQYPSGQGSFQPSQQNPQAQGFVQPQHLPLQLEEISNLALQTLPAMCNV  
YIPPYCSTTIAPFGIFGTN

>BU\_Alpha#12

ALLAIIVATTTTTAVRVPVPQLQPQNPSQQQPQEQVPLVQQQQFLGQQQQQFPGQQQPFPP  
QQPYPQPQPFPLPQLPYPQPQFPFPQQSYQPQPQYPQPQQPISQQQAQLQQQQQQQQQQQ  
QILQQILQQQLIPCRDVVLQQPNIAHASSKVSQQSYQLLQQLCQQLWQTPEQSRCQAIH  
NVIHAIILHQQQQQQQQQQQQQQQQQQQPSSQVSYQQPQQQYPSGQGSFQPSQQNPQAQGF  
VQPQQLPQFEEIRNLALQTLPAMCNVYIPPYCSTTIAPFGIMSTN

>BU\_Alpha#13

MKTFLILALLAIIVATTATTAVRVPVPQLQLQNPSQQQPQEQVPLVQEQQFPGQQQPFPPQ  
QPYPQPQPFPSQQPYLQLQPFQPQQPYPQQQPQYLQPQQPISQQQAQQQQQQQQQQQQQQ  
QQILQQILQQQLIPCRDVVLQQHNIHAHASSQVLQQSTYQLLQQLCQQLLQIPEQSRCQA  
IHNVAHAIIMHQQQQQQQEQQQQLQQQQQQQLHQQRQQPSSQVSVFQQPQQQYPSQVSVFQ  
PSQLNPPQAQGSVQPQQLPQFAEIRNLALQMLPAMCNVYIPPHCSTTIAPFGIFGTN

>BU\_Alpha#14

MKTFLILALLAIIVATTATTAVRVPVPQLQPQNPSQQQPQEQVPLVQQQQFLGQQQPFPPQ  
QPYPQPQPFPSQQPYLQLQPFQPQLPYSQPQFPRPQPYPQPQPQYSQPQEPISQQQQQ  
QQQQQQQILQQILQQQLIPCMDVVLQQHNIHAHGRSQVLQQSTYQLLQELCCQHLWQIPEQS  
QCQAIQNVVHAIILHQQQKQQQQPSSQVSVFQQPLQYPLGQGSFRPSQQNPQDQGSVQPQ  
QLPQFEEIRNLALQTLPAMCNVYIPPYCTIAPFGIFGTN

>BU\_Alpha#15

QPQQPISQQQAQQQQQQQQQILQQILQQQLIPCRDVVLQQHNIHAHASSQVLQQSSYQQLQQ  
LCCQQLFQIPEQSRCQAIHNVVHAIILHHHQQQQQQPSSQVSYQQPQEQYPSGQGSFQSS  
QQNPQAQGSVQPQQLPQFQEIRNLALQTLPAMCNVYIPPYCSTTIAPFGIFGTN

>BU\_Alpha#16

MKTFLILALLAIIVATTTTTAVRVVPVQLQPQNPSQQQPQEQVPLVQQQFQFLGQQQQHFPG  
QQQFPFPQQPYPQPPFLPQLPYPQPPFPQQSYPPQPPQYPPQPPISQQQAQLQQQQ  
QQQQQQILQQILQQQLIPCRDVLVQQPNIAHASSQVSQQSYQLLQQLCCQQLWQTPEQSR  
CQAIHNVIHAIILHHQQQQQQQQQQQQQQQQQQQQQQQQQQ

>BU\_Alpha#17

IRHEAIIPATRTNFPATPQPQYPPQPPISQQQAQLQQQQQQQQQQQILQQILQQQLIP  
CRDVLVQQPNIAHASSQVSQQSYQLLQQLCCQQLWQTPEQSRCQAIHNVIHAIILHHQQQQ  
QQQQQQQQQQQQQQQQQQQQQQPPSSQVSYPQPPQPPSGQGFQPSQQNPQAQGFVQPPQ  
LPQFEEIRNLALQTLPAMCNVYIPPYCSTTIAPFGIMSTN

>BU\_Alpha#18

LHQQQQRQQQQQQQQQQQQQQQQQQQQQQQQQQQQQQQQQQPPSSQVSFQQPQQQYPSGQG  
SFQPSQQNPQAQSSVQHQQLPQFEEIRNLALQTLPAVCNVYIPPYCSTTIAPFGIFGTN

>BU\_Alpha#23

MKTFLILALLAIIVATTATTAVRVVPVQLQPQNPSQQQPQEQVPLVQQQFQFPQQQQFPFPQ  
QPYPQPPFPSSQQPYLQLPFPQPPFPQLPYPQPPSFPQQPYQQQQPYLQPPQPPIS  
QQQAQQQQQQQQQQQQQQILQQILQQQLIPCRDVLVQQHNIHASSQVLQOSTYQLLQQL  
CCQQLLQIPEQSRCQAIHNVAHAIIMHQQQQQQEQQQQLQQQQQQQLQQQRQPPSSQVS  
FQQPQQQYPSQVSFQPSQLNPPQAQGSVQPPQLPQFAEIRNLALQTLPAMCNVYIPPHCS  
TTIAPFGIFGTN

>BU\_Alpha#26

MKTFLILALLAIIVATTATIIVRVVPVQLQPQNPSQQQPQEQVPLVQQQFQFPQQQFPFPQ  
QPYPQLQFPSSQQPYMQLPFPQPPQLPYPQPPQLPYPQPPFRPQQSYPPQPPQYSQPQQP  
ISQQQQQQQQQQQQQQILQQILQQQLIPCRDVLVQQHSIAHGSSQVLQOSTYQLVQQLCCQ  
QLWQIPEQSRCQAIHNVVHAIILHHQQQQQQQQQQQQQQQQQQ

>BU\_Omega#D1

FPQQPQQFPQPQQPIPVQPQQSFPQQSSQQSQQPFAQPQQLFPELQQPIPQQPQQPFPLO  
PQQPFPQQPQQPFPQQPQQSFPQQPQQPFPQQPQQPFPQQPQQPFPQQPQQPFPPLRPQQP  
FPQQPQQSQQSFPQPQPQQPQQPSILQPQQPLPQQPQQPQQPQQQLSQQPEQTISSQPQ  
QFPFPQQPHQPQQPYPQQQPYGSSLTSIGGQ

>BU\_Omega#D2 (BQ804665)

PQQPYPPQPPYPSQQPYPSQQPFPPTQPQFPQQSQQPFTQPQQPTPLQPQQPFPQQPQQPQ  
QFPFPQQPFPWQPQQPFPQTQQSFPLQPQQPFPQQPQQPFPQPQLQFPQQPEQIIPQQP  
QQPFLLESQQPFPQQPQQPFPQPQQILIPMQPQQPFPQQSQQSQQPFPGPQQLFPELQQPI  
PQQPQQPFPPL

>BU\_Omega#D3 (BQ838934)

PFPQQPQQPFPQPQLPFPQQSEQIIPQQPQQPFPLOPQQPFPQQPQQPFPQPQQPIPVQP  
QQSFPQQSQQSQQPFAQPQQLFPELQQPIPQQPQQPFPLOPQQPFPQQPQQPFPQQPQQS  
FPQQPQQPFPQQPQQPYPQQQPYGTSLTSIGGQ

>BU\_Omega#D4 (BQ804424)

PQQPQQPFPQTQQPQQPFPQLQQPQQPQPQQPQQPFPLOPQQPFPQQSQQPFPQQPQQPQ  
PLQPQQPFPQQPQQPFPQQPQQPFPLOPQQPFPPLRPQQPFSQQPQQSQQSFPQPQPQQPQ  
QPSILQPQQPFLQPQQQLSQQLEQTISSQPQQPFPQQPHQPQQPYPQQQPY

>BU\_Omega#D5 (BQ805896)

QPQQPQQPSILQPEQPLPQRPPQQPFLPQQQLSQQPEQTISSQPQQPHQPQQPYPQQQPY  
GTSLSIGGQ

>BU\_Omega#B1

FPQQEFPQQQQFPQQQIAQQPQQLPQQQQIIPQQPQQPFPQQQQFPQQQSPQQQQFPQQQFP  
QQQLLPQQQFPQPQQIIPQQQQIIPQQPQQPFPQQQFPQQQFPQQQEFPQQQFPQQQFHQQQ  
LPQQQFPQQQFPQQQFPQQQFPQQQQLTQQQFPRPQQSPEQQQFPQQQFPQQPQQPFPQ  
QQFPIPYPPQQSQEPSYQQYPQQQPSGSDVISISGL

>BU\_Omega#B2

PQQQIIPQQPQQPFPQQQFPQQQFPQQQFPQQQFPQQQFHQQQFPQQQFPQQQFPQQQFP  
PQQQLTQQQFPRPQQSPEQQQFPQQPQQPFPQQQFPQQQFPQQQFPQQQFPQQQFPQQQFP  
GSDVISISGL

>BU\_Omega#B3 (BQ806240)  
IPQQPQQFLQQQFPPQQPPQQHQFPPQQQLPQQQQIPQQPQQIPQQQQIPQQPQQFPPQQ  
FPQQQFPPQQFPPQQFPPQQQFPPQQQIAQQPQQLPQHQQIPQQPQQFPPQQQFPPQQSPQ  
QQQFPPQQFPPQQQLPQKQFPPQQIPQQQQIPQQPQQFPPQQFPPQQQFPPQQQFPPQQ  
FPQQQFHQQQFPPQQFPPQQ  
>BU\_LMW-GS#2  
QQQQPVLPPQQPSFSQQQLPPFSQQQPPFSQQQQPVLPPQQPPFSQQQQPILPQQPPFSQQQ  
QQPVLPPQQQILFVHPSILQQLNPCKVFLQQQCSPVAMPQSLARSQMLQQSSCHVMQQQCC  
QQLLQIPQQSRYEAIRAIIYSIILQEQQQVQGSIQTQQQQPQELGQCVSQPQQQSQQQLG  
QQPQQQQLAQGTFLQPHQIAQLEVMTSIALRTLPTMCRVNVPLYRTTTSVPFVGVGAVGA  
Y  
>BU\_LMW-GS#3  
LPPFSQQQQPVLPPQQPPFSQQQQQPILPQQPPFSQQQQPVLQQQIPFVHPSILQQLNPC  
KVFLQQQCSPVAMPQSLARSQMLQQSSCHVMQQQCCQQLPQIPQQSRYEAIRAIVYSIIL  
QEQQQVQGSIQTQQQQPQQLGQCVSQPQQQSQQQLGQQPQQQQLAQGTFLQPHQIAQLE  
MTSIALRTLPTMCNVNVSlyRTTTRVPFVGVGTGVGGY  
>BU\_LMW-GS#4  
QQQQPPFSQQQQPQFSQQQQPPYSQQQQPPYSQQQQPPFSQQQQPPFSQQQQQPPFTQQQ  
QQQQQQQPPFTQQQQPPFSQQQPPISQQQQPPFLQQQRPPFSRQQQIPVIHPSVLQQLNPC  
VFLQQQCIPVAMQRCLARSQMLQQSICHVMQQQCCQQLRQIPEQSRHESIRAIIYSIILQ  
QQQQQQQQQQQQQGSIIQYQQQQPQQLGQCVSQPLQQQLQQQLGQQPQQQQLAHQIAQLE  
VMTSIALRTLPTMCNVNVSlyETTTTSVPLGVGIGVGVY  
>BU\_LMW-GS#5  
MKTFLIFALLAIAATSIAIAQMETSrvPgleKpwQQQPLPPQQQPPCSQQQQPFPQQQQPI  
IILQQSPFSQQQQPVLPPQQPPFSQQQQPPFSQQQQPSSQQPPFPQQHQFPPQQIPVVQP  
SVLQQLNPCKVFLQQQCshVamsQRLARSQMWQQSSCHVMQQQCCQQLPQIPEQSRSEAI  
RAIVYSIILQEQQQGFVQPQQQQPQSSGQGVSHQQQSQQQQQLGQCSFQQPQQLQQLGQ  
QPQQQQIPQGIQFPHQISQLEVMTSIALRTLPTMCGVNVPLYSSTTimpfSIGTGVGGY  
>BU\_LMW-GS#7  
MKTFLIFALLAIAATSIAIAQMETSrvPgleKpwQQQPLPPQQQPPCSQQQQPFPQQQQPI  
IILQQSPFSQQQQPVLPPQQQPVIIILQQPPFSQQQQPVLPPQQPPFSQQQQQQQQQQPPFSQ  
QQQPVLPPQQPPFSQQQQPPFSQQQQPSSQQPPFPQQHQFPPQQIPVVQPSVLQQLNPC  
VFLQQQCshVamsQRLARSQMWQQSSCHVMQQQCCQQLPQIPEQSRSEAIRAIVYSIILQ  
EQQQGFVQPQQQQPQSSGQGVSHQQQSQQQQQLGQCSFQQPQQLQQLGQQPQQQQIPQ  
IFLQPHQISQLEVMTSIALRTLPTMCGVNVPLYSSTTimpfSIGTGVGGY  
>BU\_LMW-GS#8  
MKTFLVfALIavvatsIAIAQMETSscisGLerpwQQQPLPPQQSFSQQPPFSQQQQQPLPQ  
QPSFSQQQPPFSQQQPILSQQPPFSQQQQPVLPPQQSPFSQQQLVLPPQQQQQQQLVQQQI  
PIVQPSVLQQLNPCKVFLQQQCSPVAMPQRLARSQMWQQSSCHVMQQQCCQQLQIPEQS  
RYEAIRAIIYSIILQEQQQGFVQPQQQQPQSSGQGVSSQQQSQQQLGQCSFQQPQQQLG  
QQPQQQQQQVLQGTFLQ  
>BU\_LMW-GS#10 (BQ804218)  
MKTFLIFALLAIAATSIAIAQMETSrvPgleKpwQQQPLPPQQQPPCSQQQQPFPQQQQPI  
IILQQSPFSQQQQPVLPPQQQPVIIILQQPPFSQQQQPVLPPQQPPFSQQQQPPFSQQQQPSS  
QQPPFPQQHQFPPQQIPVVQPSVLQQLNPCKVFLQQQCshVamsQRLARSQMWQQSSCH  
VMQQQCCQQLPQIPEQSRSEAIRAIVYSIILQEQQQGFVQPQQQQPQSSGQGVSHQQQS  
QQQ  
>BU\_LMW-GS#11  
ARGQQPPFSQQRPPFSQQQQQPVLPPQQPPFSQQQQQQPILPQQPPFSQHQQPVLPPQQIP  
YVQPSILQQLNPCKVFLQQQCSPVAMPQSLARSQMLWQSSCHVMQQQCCQQLPRIPEQSR  
YDAIRAIIYSIVLQEQQHGQGFNQPPQQPQSSVQGVSQPQQQQKQLGQCSFQRPQQQQL  
GQWPQQQQVPOGTLLQPHQIAQLELMTSIALRTLPMMCsvNVpvyGTTTS  
>BU\_LMW-GS#12 (BQ804627)

LPQQQPVIILQQPPFSQQQQPVLPQQPPFSQQQPPFSQQQQPVLPQQPPFSQQQQPILPQ  
QPPFSQQQQPVLPQQQILFVHPSILQQLNPKVFLQQQCSPVAMPQSLARSQMLQQSSC  
HVMQQQCCQQLLQIPQQSRYEAIRAIIYSIILQEQQQVQGSIQTQQQQPQELGQCVSQPQ  
QQSQQQLGQQPQQQQLAQGTFLQPHQIAQLEVMTSIALRTLPTMCRVNVPLYRTTTSVPF  
GVGAGVGAY

>BU\_LMW-GS#13

MENSHIPGLERPSQQQQPVLPQQPPFSQQQQPILPQQPPFSQQQQPVLPQQQILFVHPS  
ILQQLNPKVFLQQQCSPVAMPQSLARSQMLQQSSCHVMQQQCCQQLLQIPQQSRYEAIR  
AIIYSIILQEQQQVQGSIQTQQQQPQELGQCVSQPQQQSQQQLGQQPQQQQLAQGTFLQ  
HQAQLEVMTSIALRTLPTMCRVNVPLYRTTTSVPFVGAGVGAY

>BU\_LMW-GS#14

MKTFLIFALLAIAATSIAIAQMETSrvPGLEKpwQQQPLPPQQQPPCSQQQQPFPQQQQQ  
QQQQPPFSQQQQPVLPQQPPFSQQQQPPFSQQQQPSSQQPPFPQQHQFPQQQIPVVQPS  
VLQQLNPKVFLQQQCshVAMSQRLARSQMWQQSSCHVMQQQCCQQLPQIPEQSRSEAIR  
AIVYSIILQEQQQGFVQPQQQQPQQSGQGVSQHQQSSQQQQQLGQCSFQQPQQQLGQQ  
PQQQQIPQGIQFLQPHQISQLEVMTSIALRTLPTMCGVNVPLYSSTTIMPFSIGTGVGGY

>BU\_LMW-GS#17

MKTFLIFALLAIAATSIAIAQMETSrvPGLEKpwQQQPLPPQQQPPCSQQQQPFPQQQQPI  
IILQQSPFSQQQQPVLPQQQPVIILQQPPFSQQQQPVLPQQPPFSQQQQPILPQQPPFS  
QQQQPVLLQQQIPFVHPSILQQLNPKVFLQQQCSPVAMPQSLARSQMLQQSSCHVMQQ  
CCQQLPQIPQQSRYEAIRAIVYSIILQEQQQVQGSIQTQQQQPQQLGQCVSQPQQQSQQ  
LGQQPQQQGGSSQPQQQTQLDQGWIAVIGTWVIQTIPAMCDVHVPPYCYTTISPSIDV  
TTGMGGY

>BU\_LMW-GS#18 (BQ806669)

QQPVLPQQQIPSVQPSILQQLNPKVFLQQQCSPVAMPQSLARSQMLWQSSCHVMQQQCC  
RQLPQIPEQSRDAIRAIISIVLQEQQHGQGLNQPQQQQPQQSVQGVSQPQQQQKQLGQ  
CSFQQPQQQQLGQWPQQQ\*VPQGTLLQPHQIAQLEVMTSIALRTLPTMCSVNVVYGT  
IVPFGVGRVGY

>BU\_LMW-GS#20

QQQIPFVHPSILQQLNPKVFLQQQCSPVAMPQSLARSQMLQQSSCHVMQQQCCQQLPQI  
PQQSRYEAIRAIVYSIILQEQQQVQGSIQTQQQQPQQLGQCVSQPQQQSQQQLGQQPQQ  
QLAQGTFLQPHQIAQLELMTSIALRTLPTMCNVNVPLYRTTTRVPPFGVGTGVGGY

>BU\_LMW-GS#21

IILQEQQQVQGSIQTQQQQPQQLGQCVSQPQQQSQQQLGQQPQQQQLAQGTFLQPHQIAQ  
LEVMTSIALRTLPTMCNVNVSlyRTTTRVPPFGVGTGVGGY

>BU\_LMW-GS#22 (BQ805913)

LPPFSQQQQPVLPQQPPFLQQQLPPFSQQQLPPFSQQQQPVLPQQPPFSQQQQQPILPQQP  
PFSQQQPILPQQPPFSQQQQLVLPQQPPFSQQQQPVLPQQSPFPQQQQHQQLVQQQIP  
VVQPSILQQLNPKVFLQQQCSPVAMPQRLARSQMLQQSSCHVMQQQCCQQLPQIPQQSR  
YEAIRAIIYSIILQEQQQVQGSIQSQQQ

>BU\_Beta-amylase#1

MEASAQQGNyVQVYVMLPLDIVSVNnrFEKGDRLKRLVEAGVDGVMVDVWWGLVEG  
KGPRVYDWSAYKQLFELVHEAGLKLQA IMSFHQCGGNVGDVvNIPIPQWVRNVGVSDPDI  
FYTDQHGRNIEYLTLGVDDQPLFHGRSAVQMYADYMASFRDNMKEFLDAGLIVDIEVGL  
GPAGELRYPSPQSHGWSFPGIGEFICYDKYLQADFKAAMVGHPEWEFPRDAGTYNDT  
PQRTRFFVDNGTYLTEQGRFFLAWYSNNLIKHGDKILDEANKVFLGHTVQLAIKISGIHW  
WYKVPShAAEVTAGYYNLHrdGYRPIARMLKRHHasLNFTCAEMRDSEQSSQAMSAPEE  
LVQQVLSAGWREGLNMACENALPRYDPTAYNTILRNARPHGINKSGPPEHKLFGFTYLRLL  
SNQLVEGQNYVNFKTFVDRMHANLPHDPCVDPVAPLQRSgpELTIEMILQAAQKLEPFP  
FEEHTDLPVQGLGGIGGGEVEDPTGGMGGEVQQDPTGGMGGEVQQDPTGGMGGEVEDP

>BU\_Beta-amylase#2

MEASVQQGNyVQVYVMLPLDAVSVNnrFEKGDRLKRLVEAGVDGVMVDVWWGLVEA  
KGPRAYDWSAYKQLFQLVHEAGLKLKA IMSFHQCGGNVGDVvNIPIPQWVRNVGASDPDI  
FYTDQHGRNIEYLTLGVDDQPLFHGRSAVQMYTDYMASFRDNMKEFLDAGVIVDIEVGL

GPAGELRYPSTYPQSHGWSFPGIGEFICYDKYLQADFKAAMVGHPEWEFPRDAGQYNDT  
PQTRFFVDNGTYLTEQGRFFLAWYSNNLIKHGDKILDEANKVFLGHRVQLAIKISGIHW  
WYKVPASHAAEITAGYYNLHNRDGYRPIARMLKRHRASLNFTCAEMRDSEQSSQAMSAPEE  
LVQQVLSAGWREGLNMACENALPRYDPTAYNTILRNARPHGINKSGPPEHKLFGFTYLRL  
SNQLVEGQNYVNFKTFVDRMHANLPHDPCVDPVAPLQRSPELTIEMILQAAQPKLGSIP  
L

>BU\_Beta-amylase#3

MEASVQQGNVQVYVMLPLDAVSVNNRFEKGDDELRLPQLKRLVDAGVDGVMVDVWWGLVEA  
KGRVYDWSAYKQLFKLVHEAGLKLQAIMSLHQCGGNVGDVVNIPIQWVRDVGASDPDI  
FYTDQHGRNIEYLTGLVDDQPLFHGRSAVQMYADYMASFRDNMKEFLDAGVIVDIEVGL  
GPAGELRYPSTYPQSHGWSFPGIGEFICYDKYLQADFKAAMVGHPEWEFPHDSGTYNDT  
PERTRFFVDNGTYLTEQGRFFLAWYSNNLIKHGDKILDEANKVFLGHRVQLAIKISGIHW  
WYKAPASHAAELTAGYYNLHNRDGYRPIARMLKRHRASLNFTCAEMRDSEQSSQARSAPPEE  
LVQQVLSAGWREGLNVACENALPRYDPTAYNTILRNARPHGINKSGPPEHKLFGFTYLRL  
SNQLVEGQNYVNFKTFVDRMHANLPHDPCVDPVAPLQRSPELTIEMILQAAQPKLEFPF

>BU\_LTP#1 (BQ806332)

MARAQVMLMAVALVLMMLAAVPRAVAIDCGHVDSLVRPCLSYVQGGPSPSGQCCGGVQSL  
HNQAQSKSDRQAACNCLKGIARGIHNLNEDNARSLAPKCGVNLPHYISLDIDCNSV

>BU\_LTP#5 (BQ804735)

MARLNSKAVVSAVLAAMVMMAGREATALSCGQVDSKLAPCVSYVTGKAPISKECCSG  
VQGLNGLARSSPDRKIACRCLKSLATSIKINMDKVSVPKCGVSVFPFISMSTNCNNV  
N

>BU\_LTP#6 (BQ804678)

MAAPRGAAVMLAVVLAAMVVAPPATVHAISCSTVYSTLMPCLQYVQGGSPARGCCTGIQ  
NLLAEANNSPDRRTICGCLKNVANGASGGPYITRAAALPSKCNVALPYKISPSVDCNSIH

>BU\_LTP#7 (BQ804322)

MAAPRGAAVVLAMVLAAMVVAPPATVHAISCSTVYSTLMPCLQYVQGGSPARGCCTGI  
QNLLAEANNSPDRRTICGCLKNVANGASGGPYITRAAALPSKCNVALPYKISPSVDCNSI  
H

>BU\_LTP#8 (BQ805085)

MAAPRGAAVVLAMVLAAMVVAPPATVHAISCSTVYSTLMPCLQYVQGGSPARGCCTGIQ  
NLLAEANNSPDRRTICGCLKNVANGASGGPYITRAAALPSKCNVALPYKISPSVDCNSIH

>BU\_LTP#9 (BQ839001)

ARRAHAAATLALLVAALVLSAAPAPAEGAVANCGQVVSYLAPCISYAMGRVSAPGGGCCS  
GVRGLNAAAATPADRKTCTCLKQQASGIGGIKPNLVAGIPGKCGVNIPYAISQGTDCSK  
VR

>BU\_LTP#10 (BQ804802)

MAARRAHAAALALLVAALVLSAAPAPAEGAVANCGQVVSYLAPCISYAMGRVSVPGGGC  
CSGVRGLNAAAATPADRKTCTCLKQQASGMGGIKPNLVAGIPGKCGVNIPYAISQGTDC  
SKVR

>BU\_LTP#11 (BQ807269)

MARVALVAVFAVLAALAVAEMASGAVTCGDVTSAVAPCMSYARGQASAPSGACCSGVRTL  
NAKASTPADRKAACNCLKNLAGSGISMGNAANIPGKCGVSVSFPINTKTNCNNLH

>BU\_LTP#12 (BQ807211)

MARVALLAVFAVLAALAVAEMASGAVTCGDVTSAVAPCMSYATGQASAPSAGCCSGVRTL  
NAKASTSADRQAACRCLKKLAGSGISMGNAANIPGKCGVSVSFPINTKVDCNTYILHP

>BU\_LTP#13 (BQ806247)

MARAAATQLVLVALVAAMLLVATDAASCQVSSALSPCISYARGNGANPTAACC SGVRS  
LAGAARSTADKQAACKCIKSAAGGLNAGKAAGIPSKCGVSVPYAISASVDCSKIR

>BU\_LTP#14 (BQ804683)

MAPAGTRGARAAAPAALLVAALLVALALAPRGTSAAALTCSTVYNELMPCLGYVQSGGAV  
PRACCSGIKTLVSRARATPDRRAACACLKTVA AAAAGGPYLGRAAGLPGRCGVQPPFKID  
PNVNCNAV

>BU\_farinin#1

MKTMFILALLALAATAIAQLETICSQGFQGCQHQQQLGQQQLLDQMKPCVAFVQHQCSP  
VRTPFPQTRGEQHSSCQTVQHQCRRQLVQIPEQARCKAIQSVEEAI IQQQPQQQWNEPQQ  
EAHLKSMRMSLQTLPSMCNIYVPVQCQQQQQLGRQQQQQLQEQLKPCATFLQHQCRRPMTV  
PFPHTPVQKPTSCQNVQSQCCRQLAQIPEQFRCQAIHNVVESIRQQQHQPQQEVQLEGL  
RMSLHTLPSMCKIYIPVQCPATTTTTTPYSITMTASYTDGTC

>BU\_farinin#2

MKVFILALLALAATAIAQLETTCSQGFQGSQQQQQPGQRQLLEQMKPCVAFLOQKCSPL  
RMPFLQTQVEQLSSCQIVQYQCCQQLAQIPERTRCHAIHIVVEAIIQQQSQQQWQEPQQQ  
AQHKSMRMLLENLSLMCNIYVPVQCQQQQQLGQQQQQLQEQLTPCTTFLQQCSPVTV  
FPQIPVDQPTSCQNVQHQCRRQLSQIPEQFRCQAIHNVVAEAI RQQQPQQQWQGMYPQQP  
AQLESIRMSLQALRSMCSIYIPVQCPAPTYYNIPLVATYTGAC

>BU\_farinin#3

MKVFILALLALTATTAIAQLETTCSQGFQGYQQQQQPGQRQLLEQMKPCVAFLOQQRPL  
RMPFLQTQVEQLSSCQIVQHQCRRQLAQIPERIRCHAIHIVVEAIMQQQSQQQWQERQQQ  
AQHKSMRMLLENLSLMCNIYVPVQCQQQQQMGQQQQQLQEQLTPCATFLQHQCSPVTV  
PFPQIPVDQPTSCQNVQHQCRRQLSQIPEQFRCQAIHNVVAEAI RQQQPQQQWQGMYPQQ  
PAQHESIRMSLQALRSMCNIYIPVQCPAPTAYNIPMVATCTSGAC

>BU\_Triticin#1 (BQ804884)

MAATSFASLSFYFCILLCHSSMAQLFGMSFNPWQSSRQGGFRECTFNRLQASTPLRQVR  
SQAGLTEYFDEENEQFRCTGVFAIRRVIEPRGYLLPRYHNTHGLVYIIQGS GFAGLSFPG  
CPETFQKQFQKYGQSQSVQGSQSQKFKDEHQKVRFRQGDVIALPAGIVHWFYNDGDAP  
IVAIYVFDVNNYANQLEPRHKEFLFAGNYRSSLHS

>BU\_Triticin#2 (BQ806424)

MAATSFASLSFYFCILLCHSSMAQLFGMSFNPWQSSRQGGFRECTFNRLQASTPLRQVR  
SQAGLTEYFDEENEQFRCTGVFAIRRVIEPRGYLLPRYHNTHGLVYIIQGS GFAGLSFPG  
CPETFQKQFQKYGQSQSVQGSQSQKFKDEHQKVRFRQGDVIALPAGIVHWFYNDGDAP  
IVAIYVFDVNNYANQLEPRHKGILCSLATIGVRNFTLVKTYSVGF DVRLLAELGTSGKI  
AQRLOSQNDII

>BU\_Triticin#3 (BQ804747)

MAATSFASLSFYFCILLCHSSMAQLFGMSFNPWQSSRQGGFRECTFNRLQASTPLRQVR  
SQAGLTEYFDEENEQFRCTGVFAIRRVIEPRGYLLPRYHNTHGLVYIIQGS GFAGLSFPG  
CPETFQKQFQKYGQSQSVQGSQSQKFKDRHQKVRFRQGDVIALPAGIVHWFYNDGDAP  
IVAIYVFDVNNYANQLEPRHKEFLFAGNYRSSLHSSQNIFSGFPCSIAC

>BU\_Triticin#4 (BQ806311)

DSARGNSQEEQPQMGQSQGEQPQTGQSQGKHIQGEQPQMGQSQAKHYQGDQPEEGQEGQS  
QEEQSQAGPYPGCQPRAGQSHASQSTYGGWNGLEENFCDHKLSVNIDDP SRADIYNPRAG  
TITRLNTQTFPILNIVQMSATRVHLYQNAIISPLWNINAHSMYMIQGH IHWVQVNDHGR  
NVYNGLLSPGQLLIIPQNYVVMKKAQRDGSKYIEFKTNANSMVSHIAGKSSILGALPVDV  
IANAYGISRTEA

>BU\_Triticin#5 (BQ806681)

EGQSQAKHSQEEQPQMGQSQGEQPQTGQSQGKHIQGEQPQMGQSQAKHYQGDQPEEGQEG  
QSQEEQSQAGPYPGCQPRAGQSHASQSTYGGWNGLEENFCDHKLSVNIDDP SRADIYNPR  
AGTITRLNTQTFPILNIVQMSATRVHLYQNAIISPLWNINAHSMYMIQGH IHWVQVNDH  
GRNVYNGLLSPGQLLIIPQNYVVMKKAQRDGSKYIEFKTNANSMVSHIAGKSSILGALPV  
DVIAHAYGIS

>BU\_Triticin#6 (BQ806874C)

PILNIVQMSATRVHLYQNAIISPLWNINAHSMYMIQGH IHWVQVNDHGRNVFNDLLSPG  
QLLIIPQNYVVLKKAQRDGSKYIEFKTNANSMVSHIAGKNSILGALPVDVIANAYGISRT  
EARS LKFSREEELGVFAPKFSQSIFRSFPNGEEESS

>BU\_Wheatwin#1 (BQ806289)

MAVRLMLVAALLCAAAAAAAAAQQANNVRATYHYRPAQNNWDLGAPAVSAYCATWDASKP  
LSWRSKYGWTAFCGPAGAHGQAACGKCLRVTNPATGAQVTARIVDQCANGGLDLWDVTF  
TKIDTNGVGYQQGHLNVNYQFVDCRD

>BU\_Wheatwin#2 (BQ804430)



MAARLMLVAALLCAAAAAATAQQATNVRATYHYRPAQNNWDLGAPAVSAYCATWDASKP  
LSWRSKYGWTAFCGPAGAHGQAACGKCLRVTNPATGAQITARIVDQCANGGLDLDWDTVF  
TKIDTNGIGYQQGHLNVNYQFVDCRD

>BU\_Globulin-2\_Contig17295

MKSTVVRSPWLALALVLSLCLSLSFASWDAEDVGRGSRRWQEGGDDEGRSGSGSRPYHF  
GEESFREWAKSRHGFKVLERFDHELLRGSIGDYRVACLDAAPRAFLQPSHYDADEIAFV  
REGGVLVLLRNGKRESFCVREGDVFVIPAGSIVYSANTHRKWFVRVMLLNPNVSTPGSF  
QEFSPIGFGGGEQPQSFFSVFSDEVIQAAFNTRQREDVDRVFORKSRGEGPISEGSEEQIR  
ELSRSCSRGGRGGGGGSGSEKEDIQPRSLTGEKPRYSNKHGRFHQITGDQCHHLRKLDM  
VTLVNITRGSMTALRYATRSTRIYIVVEGRDGYFEMACPHVSSFGSRERREHEQEREREH  
GHGRRSEEREREHGQGRRSEERKDEQGRQEEEQGRGQEQEKSRGYRQVRAQIKVGSVIVL  
PAGHPATFVAGNEGNLALLSFGVGANNDEEVFVTGGNSVLKQLDEAAKALAFPQQARELA  
DRVIRAQPESVFPVPGPQQRRVADM

>BU\_Globulin-2\_Contig\_17366

MKSTVVRSPWLALALVLSLCLSLSFASWDAEDEGRGSRRWQEGGDERRSGESGRPYHFGE  
ESFREWAKSRHGFKVLERFDHELLRGSIGDYRVACLDAAPRAFLQPSHYDADEIAFVRE  
GEGVLVLLRNGKRESFCVREGDVFVIPAGSIVYSANTHRKWFVRVMLLNPNVSTPGSFQ  
FSPIGFGGGEQPQSFFSVFSDEVIRAAFNTRQREDVDRVETKSRGEGQISEGSEEQIREL  
SRSCSRGGRGGGGGSGSEKEDIQPRSLTGEKPRYSNKHGRFHQITGDQCHHLRKLDM  
LVNITRGSMTALRYTTRSTRIYIVVEGRDGYFEMACPHVSSSGRERREHEQEREREHGH  
GRRSEERGQEHGRRSEEEHGHGGEQEKSRGYRQVRAQIKWGR

>BU\_Globulin-2\_Contig\_18428

DHHWLVLAIVLSLCLSLSFASWDAEDVGRGSRRWQEGGDDEGRSGSGSRPYHFQESYREW  
AKSRHGFKVLERFDHELLRGSIGDYRVAYLDAAPRAFLQPSHDDADEIAFVREGGVLV  
LLRNGKRESFCIREGDVIVIPAGSIVYSANTHRKWLVRVVMFINPVSTPGRFQEFFLIGS  
GDERPQSFLSVFSDEVIQAALNTRREDVDRVFEKSKGEGEIEASEEQIRELSRSCSRG  
GRGGGGGSGSEKEDIQPRSLTGEKPRYSNKHGRFHQITGDQCHHLRKLDMVTLVNITRGS  
MTALKYTTRSTRIYVVVEGRDGYFEMACPHISSSGRERREHEQEREREHGQGRRSEERE  
REQRGRRSEEREQEQGRQEEEQGHGREQEKSRGYRQVRAQIKVGSVIVLPAGHPATFVA  
GNDGNLALLSFGVGANNDEEVFVTGGNSVLKQLDEAAKALSFPQQARELADRVIRAQPES  
VAVAGPQQRRVADM

>BU\_Avenin-like-a#1

MKTMFLLALLAFTATSAVAQLYTTCSQGYGQCQQQPQPQPQPQMNTCAAFLOQCSQTP  
HVQTQMWQASGCQLVRQCCQPLAQISEQARCQAVCSVAQIIMRQQQGQSFQGPQQQVPV  
EIMRMVLQTLPLMCRVNIPQYCTTTTPCSTITPAIYSIPMTATCAGGAC

>BU\_Avenin-like-a#2

MKTMFILALLAFTATSAVAQLYTTCSQGYGQCQQQPQPQPQPQMNTCAAFLOQCIQTPYVQS  
QMWQASSCQLMRQCCQPLAQISEQARCQAVCSVSQIIMRQQQGQRFQGPQQQGGQSFQ  
PQQQVPVEIMRMVLQTLPSMCSVNIPQYCTTTTPCSTITPAIYSIPMTATCAGGAC

>BU\_Avenin-like-a#3

MKNLFILALLAFTATSAVAQLYTTCSQGYGQCQQQPQPQPQPQPQMNTCAAFLOQCSQ  
TAYVQSQMWQASGCQLMRQCCQPLAQISEQARCQAVCSVAQIIMRQQQGQRFQGPQQQ  
GQSFQGPQQQVPVEXMGMVLQTLPSMCSVNIPQYCTTTTPCSTIAPAIYNIPMTATCAGGA  
C

>BU\_purin#1 (BQ838917)

MKKFLVLALIVVAATTTAAEPFTAFRTAWEPHHPSSPEQQPTPQPQEQPVPHQKLNPCRD  
ALLQOCSPVADMSFLRSQVVQHSSCLVMWEQCCQQLKAIPKQSRCEAIHNVVHAIIVLQQQ  
QQLVQGI STQPQQQQQQGQQQQGQSSQPQQQTQLDQGWIAVIGTWVIQTIPAMCDVHVP  
PYCYTTISPSIDVTTGMGGY

>BU\_purin#2 (BQ804660)

MKKFLVLALIVIAATTTAAEPFTAFRIASEPQHPSSPEQQPTLQPQEHVPVPHQKLNPCRD  
ALLHQCSPVADMSFLRSQVVQHSSCLVMWEQCCQQLKAIPKQSRCEAIHNVVHAIILQQQ  
KQLVQGTSTQPQQQQQQGQQEHGQSSQPQHQQQQQQQLDQGWIAVIGTWVIQTVPAMCDV  
HVPYCYTTISSSDVTTGMGGY

>BU\_purin#3 (BQ804472)  
MKKFLVLAALIVVAATTTAAEPFTAFRSAWEPQHPSSEPHQPTPQPQEHVPVPHQKLNPCR  
DALLQQCSPVADMSFLRSQVVQHSSCLVMWEQCCQQLKAIKQSRCEAIHNVVHAIILQQQ  
QQLVQATSTQPQQQQQQGQQQQQGLGSSQPQQQTQLDQGWIAVIGTWVIQTIPAMCDVHV  
PPYCYTTISPSSDVTDDMGY

>BU\_Alpha#27  
MKTFLILALVATTATTAVRVVPVQLQPKNPSQQQPQEQVPLVQQQQFPGQQQFPPQQPY  
PQPQPFPSQQPYLQLQPFPPQPQLPYPQPQSFPPQQPYPQQRPKYLQPQQPISQQQ  
AQQQQQQQQQQQQQQQQQILQQILQQQLIPCRDVVLQQHNIHASSQVLQQSTYQLLQQLC  
CQQLLQIPEQSRCQAIHNVVHAIIMHQEQQQQLQQQQQQQLQQQQQQQQQQQQPSSQVS  
FQQPQQQYPSQVSFQPSQLNPPQAQGSVQPQQLPQFAEIRNLALQTLPAMCNVYIPPHCS  
TTIAPFGIFGTN

>BU\_Alpha#BQ807130  
FGTRSPVPVQLQPNPSQQQPQEQVPLVQQQQFPGQQQFPPQQPYQPQPFPSQQSYQP  
QPYPQPQQPISQQQAQLQQQQQQQQQQILQQILQQQLIPCRDVVLQQPNIAHASSQVSQ  
QSYQLLQQLCCQQLWQTPEQSRCQAIHNVVHAIILHHQQQQQQQQQQQQQQQQQQQQ  
QQQQQQPSSQVSQYQPQQQYPSGQGSFQPSQQNPQAQGFVQPQQLPQFEEIRNLALQTL  
PAMCNVYIPPYCSTTIAP

>BU\_Alpha#BQ806209  
MKTFLILALLAIVATTATTAVRVVPVQLQPNPSQQQPQEQVPLVQQQQFPGQQQFPPQ  
QPYPQPQPFPSQQPYLQLQPFPPQPQLPYPQPQLPYPQPQFRPQQPYQPQPQYSQPQQP  
ISQQQQQQQQQQILQQILQQQLIPCRDVVLQQHNIHGRSQVLQQSTYQLVQQLCCQQLWQ  
IPEQSRCQAIHNVVHAIILHHHQQQQQQQQLTQVVSFQQPQQQYP

>BU\_Alpha#BQ805841  
MKTFLILALLAIVATTATTAVRVVPVQLQPNPSQQQPQEQVPLVQQQQFLGQQQFPPQ  
QPYPQPQPFPSQQPYLQLQPFPPQPQLPYSQPQFRPQQPYQPQPQYSQLQQPISQQQQQ  
QQQQQQQQQQQQQQQQQQQQQQQQQQQQQQEQQILQQILQQQLIPCMDVVLQQHNIHGRS  
QVLQQSTYQLLQELCCQHLWQIPEQSQCAIHNVVHAIILHQQQKQQQQ

>BU\_Alpha#BQ807194  
MKTFLILALLAIVATTTTTAVRVVPVQLQPNPSQQQPQEQVPLVQQQQFLGQQQQQFPG  
QQQFPPQQPYQPQPFPPQPQLPYPQPQFPQQSYQPQPQPQYPQPQQPISQQQAQLQQQQ  
QQQQQQQQQQQQQQQQQQQQQQQQQQQQQQEQQILQQILQQQLIPCMDVVLQQHNIHGRS  
LWQTPEQSRCQAIHNVVHAIILHHHQQQQQQQQQQQQQQQQLQQPSSQVSQYQPQQQYPS

>BU\_Alpha#BQ838853  
RSQVLQQSTYQLLQELCCQHLWQIPEQSQCAIHNVVHAIILHQQQKQQQPSSQVSFQQ  
PLQQYPLGQGSFRPSQQNPQARGSVQPQQLPQFEEIRNLALQTLPAMCNVYIPPYCTIAP  
FGIFGTN

>BU\_serpin#1  
MATTLATDVRLSIAHQTRFALRLASTISSNPKSAASNAAFSPVSLHSALSLLAAGAGSAT  
RDQLVATLGTGEVEGLHALAEQVVQFVLADASSAGGPRVAFANGVFVDASLLLKPSFQEL  
AVCKYKAETQSVDFQTKAAEVTTQVNSWVEKVTSGRIKNILPSGSVDNTTKLVLANALYF  
KGAWTDQFDSYGTKNDFYLLDGSSVQTPFMSSMDDQYISSSDGLKVLKLP

>BU\_serpin#2  
MATTLATDVRLSIAHQTRFALRLASTISSNPKSAASNAVSPVSLHVALSLLAAGAGSAT  
RDQLVTTLGTGEVEGLHALAEQVVQFVLADASSAGGPHVAFANGVFVDASLLLKPSFQEL  
AVCKYKAETQSVDFQTKAAEVATQVNSWVEKVTSGRIKDILPSGSVDNTTKLVLANALYF  
KGAWTDQFDSSGTKNDFYLPDGSSVQTPFMSSMDDQYLSSSDGLKVLKLPYKQGGDKRQ  
FSMYILLPEAPGGLSNLAEKLSAEPDFLERHIPRQRVALRQFKLPKFKISFETEASDLLK  
CLGLQLPFSNEADFSEMVDSPMAHGLRVSSVFHQAFVEVNEQGTEAAASTAIKMALLQAR  
PPSVMDFIADHPFLFLLREDISGVVLFMGHVVNPLLS

>BU\_serpin#3  
MATTLATDVRLSIAHQTRFALRLASTISSNPKSAASNAAFSPVSLYSALSLLAAGAGSAT  
RDQLVATLGTGKVEGLHALAEQVVQFVLADASSAGGPRVAFANGVFVDASLLLKPSFQEI  
AVCKYKAETQSVDFQTKAAEVTTQVNSWVEKVTSGRIKDILPPGSIDNTTKLVLANALYF

KGAWTEQFDSYGTKNDYFYLLDGSSVQTPFMSSMDDQYLLSSDGLKVLKLPYKQGGDNRO  
FFMYILLPEAPGGLSSLAEKLSAEPDFLERHIPRQRVALRQFKLPKFKISFGIGASDLLK  
CL  
>BU\_serpin#4  
RHEDLFLPCPLFQGAWTDQFDSYGTKNDYFYLLDGSSVQTPFMSSMDDDQYISSSDGLKV  
LKLKYKQGGDNROFSMYILLPEAPGGLSSLAEKLSAEPDFLERHIPRQRVAIRQFKLPKFK  
KISFGIEASDLLKCLGLQLPFSDEADFSEMVDSPMPQGLRVSSVFHQAFVEVNEQGTEAA  
ASTAIKMVPQQARPPSVMDFIADHPFLFLLREDISGVVLFMGHVVNPLSS  
>BU\_serpin#5  
MATTLATDVRLSIAHQTRFAFRLASAISSNPESTVNNAAFSPVSLHVALSLITAGAGGAT  
RNQLAATLGEGEVEGLHALAEQVVQFVLADASNIGGPRVAFANGVFVDASLQKPSFQEL  
AVCKYKAEAQSVDFQTKAAEVTAQVNSWVEKVTGLIKDILPAGSIDNTTRLVLGNALYF  
KGAWTDQFDPRATQSDDFYLLDGSSIQTPFMYSSEEQYISSSDGLKVLKLPYKQGGDKRO  
FSMYILL  
>BU\_serpin#6  
APHLIHPKSAASNAAFSPVSLHSALSLLAAGAGSATRDQLVATLGTGEVEGLHALAEQVV  
QFVLADASSYCSPPVWGCAAVGGGEARASRGEPREERRTEEGNGGVDLRGPRGGGRAGR  
HRNAGLRRAAARARALQRRHID  
>BU\_serpin#7  
MATTLATDVCLSVAHQTRFALRLASAISSDPESATGNVAFSPVSLHVALSLITAGAGGTT  
RDQLVAI LGNENAGGPEGLHSLAEQVVQLVLADASITGDPRVAFANGVFVDASLSLKPSF  
QELAVCNKYKSEVQSVDFQNKAPEIASQVNSWVENVTGLIREILPEGSIDYTTTRLVLGNA  
LYFKGLWTEKFDESKTKYDKFHLLNGNTVQTPFMSSTNKQYIS  
>BU\_serpin#8  
MKRHIPRQRVALRQFKLPKFKISFETEASDLLKCLGLQLPFSNEADFSEMVDSPMAHGLR  
VSSVFHQAFVEVNEQGTEAAASTAIKMALLQARPPSVMDFIADHPFLFLLREDISGV  
>WMAI\_BU-1  
MWMKTVFWGLLVFMLVATTMAVEYGARSHNSGPWSWCDPATGYKVSALTGCRAMVKLQCV  
GSQVPEAVLRDCCQQLADINNEWCRCDLSSMLRSVYQELGVREGKEVLPGCRKEVMKLT  
AASVPEVCKVIPNPSGDGAGVGYWAAYPD  
>WMAI\_BU-2  
MLMKTVMFWGLLLFMLVATTMAVEYGARSHNSGPWSWCDPATGYKVSALTGCRAMVKLQCV  
GSQVPEAVLRDCCQQLADINNEWCRCDLSSMLRSVYQELGVREGKEVLPGCRKEVMKLT  
AASVPEVCKVIPNPSGDGAGVGYWAAYPD  
>WDAI-BU-1  
MSMKTVMFVSVLLLCMLVATPIAAEYDAWSVNSGPWMCYPGQAFQVPALPACRPLLRQCNG  
SQVPEAVLRDCCQQLAHISEWCRCGALYSMLDSMYKEHGAQEGQAGTGAFPRCRREVVKL  
TAASITAVCRLP IVVDASGDGAYVCKDVAAYPDA  
>WDAI\_BU-2  
MSMKTVMFVSVLLLCMLVATPIAAEYDAWSGNSGPWMCYPGQAFQVPALPACRPLLRQCNG  
SQVPEAVLRDCCQQLAHISEWCRCGALYSMLDSMYKEHGAQEGQAGTGAFPRCRREVVKL  
TAASITAVCRLP IVVDASGDGAYVCKDVAAYPDA  
>WDAI\_BU-3  
MSMKTVMFVSVLLLCMLVATPIAAEYDAWSVNSGPWMCYPGYAFKVPALPGCRPVLKQCNG  
SQVPEAVLRDCCQQLADISEWCRCGALYSMLDSMYKEHGVQEGQAGTGAFPSCRREVVKL  
TAASITAVCKLP IVIDASGDGAYVCKGVAAYPDA  
>WDAI\_BU-4  
MKIVFVSVLLLCMLVATPIASEYGAWSYNSGPWMCYPGQAFQVPALPGCRPLLRQCNGSQ  
VPEAVLRDCCQQLADISEWCRCGALYSMLDSMYKEHGVSEGQAGTGAFPSCRREVVKLTA  
ASITAVCRLP IVIDASGDGAYVCKDVAAYPDA  
>WTAI-CM1\_BU-1  
MASKSSISPLLLATVLSVFAAATATGPYCYAGMGLP INPLEGCREYVAQQTGIGISISGS  
AVSTEPGNTPRDRCKELYDASQHCRCCEAVRYFIGRRSDPNSSVLKDLPGCPREPQRDFA  
KVLVTPGHCVNMTVHNAPYCLGLDI

>WTAI-CM2\_BU-1  
MASKSSI THLLLA AVLVS VF AAAAAATGPYCYPGMGLPSNPLEGCREYVAQQTCGVGIVGS  
PVSTEPGNTPRDRCKELYDASQHCRC EAVRYF IGR TSDPNSGVLKDLPGCPREPQRDFA  
KVLVTPGHCVMTVHNTPYCLGLDI  
>WTAI-CM3\_BU-1  
MACKSSCS LLLLA AVLLSV LAAASASGSCVPGVAFRTNLLPHCRDYVLQOTCGTFTPGSK  
LPEWMTSASIYSPGKPYLAKLYCCQELAEISQQCRCEALRYFIALPVPSQPVDPRSGNVG  
ESGLIDLPGCPREMOWDFVRLLVAPGQC NLATIHNVR YCPAVEQPLWI  
>WTAI-CM3\_BU-2  
MACKSSCN LLLLA AVLLSV VAAASASGSCVPGVAFRTDLLPHCRDYVLQOTCGTFTPGSK  
LPEWMTSASIFSPMKPYLAKLYCCQELAEIPQQCRCEALRYFIALPVPSQPVDPRSGNVG  
ESGLIDLPGCP RQMOWDFVRLLVAPGQC NLATIHNVR YCPAVEQLLWI  
>WTAI-CM16\_BU-1  
MASKSNCV LLLLA AVLVS IFAAVA AIGNEDCTP WMSTLITPLPSCR DYVEQQACRIETPGS  
PYLAKQQCCGELANIPQQCR CQALRYFMGPKSRPDQSGLMELPGCPREVQMD FVRILVTP  
GYCNLTTVHNTPYCLAMEESQWS  
>WTAI-CM17\_BU-1  
MASKSNYN LLLFA ALLVF IFAAVA AVGNEDCTP WTSTLITPLPSCR NYVEEQACRIEMPGP  
PYLAKQECCEQLANIPQQCR CQALRYFMGPKSRPDQSGLMELPGCPREVQ MNFVPI LVTP  
GYCNLTTVHNTPYCLGMEESQWS  
>WASI\_BU-1  
DPPPVDH TDGNE LRADANY YVLPANRA HGGGLTMAPGHGRR CPLFVSQEADGQRDGLPVR  
IAPHGGAPSDKI IRLSTDVRI SFRAYTTCVQSTEW HIDSELVSGRRHVITGPVRDPSPSG  
RENAFRIEKYSGAEVHEYKLMACGDSCQDLGVFRDLKGGAWFLGATEPYHV VVFKKAPPA  
>WASI\_BU-2  
MSSRRVGLL FISLLAIALSCSADPPPVDH TDGNE LRADANY YVLPANRA HGGGLTMAPGH  
GRR CPLFVSQEADGQRDGLPVR IAPHGGGAPSDKI IRLSTDVRI SFRAYTTCVQSTEW HI  
DSELVSGRRHVITGPVRDPSPSGRENAFRIEKYSGAEVHEYKLMACGDSCQDLGVFRDLR  
GGAWFLGATEPYHV VVFKKAPPA  
>CMx\_BU-1  
MAFKHQ LILSTA ILLAVLAAASASFR EQCVPGREITYESLNACAEYAVRQTCGYL SAER  
EKRRCCDELSKVPKFCRCEVLHILMDGRVTKEGVVKG SLLQEDMSRCKKLTREFIAGIVG  
RECNLETV LGPYHYCPTEYPEVVV  
>CMx\_BU-2  
MPFKHQ LLLSTA VLLAALAAGSASFRDR CVPGREITYESLNACREYAVRQTCGYL SAER  
QKRRCCDELSKVP ELCRCEVLRI LMDGRVTKEGVVKG SLLQDMSGCKKLTREFIAGIVGR  
EECNLETV FGRYHYCPSEYLGPEVVV  
>CMx\_BU-3  
MAFKHQ LILSTA ILLAVLAAASASFRDR CVPGREIPYESLNACREYAVRQTCGYL SAER  
LKRQCCDELSKVP ELCRCEVLHILMDGRVTKEGVVKG SLLK DMSGCKKLTREFIAGIVGR  
EECNLETV FGRYHYCPTQYPEVVV  
>WTI\_BU-1  
LSALVLLS ILAAAVATIACRPGVGIPPKPLP SCRAYVVQKTCKDTQQ TTPGKVASKDPCC  
RELA VSEECRCTAMEDFMQ GMLRLEGVPEGCTRKDLWEFTLSLVKPELCNLKTI GGPYC  
GLPPSNDARLADSVQDV  
>WCI\_BU-1  
MASCSQHLLS AVAIFSVLAAAATATSMYTCYEGVGLPVDPLQGCHYYVTSQT CGFVPLLP  
IEVMKDRCCRELA AISNCRCEGLRVFIDRAFPPS QSQGGGPPQPPLAPRCPT EVKR DFA  
RTLALPGQC NLPTI HGGPYCVFP  
>BU-LMW-GS\_PCR#2  
MKTFLIFALLAVAATS AIAQMETS RVPGLEK PWQQQPLPPQQQPPCSQQQQPPFQQQQPI  
IILQQSPFSQQQQPVLPQQQPVI IILQQPPFSQQQQPVLPQQPPFSQQQQQQQQQQPPFSQ  
QQQPVLPPQQPPFSQQQQPPFSQQQQPSSQQPPFPQQHQQFPQQQIPVVQPSVLQQLNPKC  
VFLQQQC SHVAMSQRLARSQ MWQQSSCHVMQQQCCQQLPQIPEQSRSEAIRAIVYSIILQ

EQQQGFVQPQQQQPQQSGQGVSSHQQSSQQQQQLGQCSFQQPQQLQQLGQQPQQQQIPQG  
IFLQPHQISQLEVMTSIALRTLPTMCGVNVPLYSSTTIMPFSIGTGVGYY

>BU-LMW-GS\_PCR#3

MKTFLIFALLAVAATSAIAQMETRCIPGLERPWQQQPLPPQQTFFPQQPLFSQQQQQQQLFP  
QQPSFSQQQPPFWQQQPPFSQQQPILPQQPPFSQQQQLVLPQQPPFSQQQQPVLPPQQSP  
FPQQQQQHQQQLVQQQIPVVQPSILQQLNPKVFLQQQCSPVAMPQRLARSQMLQQSSCHV  
MQQQCCQQLPQIPQQSRYEAIRAIIYSIILQEQQQVQGSIQSQQQQPQQLGQCVSQPQQQ  
SQQQLGQQPQQQQLAQGTFLQPHQIAQLEVMTSIALRILPTMCSVNVPLYRTTTSVPPFGV  
GTGVBAY

>BU-LMW-GS\_PCR#9

MKTFLV FALLAVAATSAIAQMETRCIPGLERPWQQQPLPPQQTFFPQQPLFSQQQQQQQLFP  
QQPSFSQQQPPFWQQQPPFSQQQPILPQQPPFSQQQQLVLPQQPPFSQQQQPVLPPQQSP  
FPQQQQQHQQQLVQQQIPVVQPSILQQLNPKVFLQQQCSPVAMPQRLARSQMLQQSSCHV  
MQQQCCQQLPQIPQQSRYEAIRAIIYSIILQEQQQVQGSIQSQQQQPQQLGQCVSQPQQQ  
SQQQLGQQPQQQQLAQGTFLQPHQIAQLEVMTSIALRILPTMCSVNVPLYRTTTSVPPFGV  
GTGVBAY

>BU-LMW-GS\_PCR#28

MKTFLV FALLAVAATSAIAQMETRCIPGLERPWQQQPLPPQQTFFPQQPLFSQQQQQQQLFP  
QQPSFSQQQPPFWQQQPPFSQQQPILPQQPPFSQQQQQPVLQQQILFVHPSILQQLNPK  
KVFLQQQCSPVAMPQSLARSQMLQQSSCHVMQQQCCQQLLQIPEQSRDAIRAIISIVL  
QEQQHGQGLNQPQQQQPQQSVQGVSQPQQQQKQLGQCSFQQPQQQQLGQWPQQQQVPQGT  
LLQPHQIAQLEVMTSIALRTLPTMCSVNVVYGTITIVPPFGVGTTRVBAY

>BU-LMW-GS\_PCR#34

MKTFLV FALLALAAASAVAQISQQQQAPPFSSQQQPPFSQQQQPPFSQQQQSPFSQQQQQ  
PFTQQQQPPFSQQQPIISQQQQPPFLQQQRPPFSRQQQIPVIHPSVLQQLNPKVFLQQQC  
IPVAMQRCLARSQMLQQSICHVMQQQCCQQLRQIPEQSRHESIRAIISYIILQQQQQQQ  
QQQQQQGQSI IQYQQQQPQQLGQCVSQPLQQLQQLGQQPQQQQLAHQIAQLEVMTSIAL  
RTLPTMCSVNVPLHETTTSVPLGVBGIGVBAY

>BU-LMW-GS\_PCR#35

MKTFLV FALLALAAASAVAQISQQQQAPPFSSQQQPPFSQQQQPPFSQQQQSPFSQQQQQ  
QPF TQQQQPPFSQQQPIISQQQQPPFLQQQRPPFSRQQQIPVIHPSVLQQLNPKVFLQQQ  
CIPVAMQRCLARSQMLQQSICHVMQQQCCQQLRQIPEQSRHESIRAIISYIILQQQQQQQ  
QQQQQQGQSI IQYQQQQPQQLGQCVSQPLQQLQQLGQQPQQQQLAHQIAQLEVMTSIA  
LRTLPTMCSVNVPLHETTTSVPLGVBGIGVBAY

>BU-LMW-GS\_PCR#45

MKTFLV LALLAVAATSAIAQMETRCIPGLERPWQQQPLPPQQTFFPQQPLFSQQQQQQQLFP  
QQPSFSQQQPPFWQQQPPFSQQQPILPQQPPFSQQQQLVLPQQPPFSQQQRVLPQQSP  
FPQQQQQHQQQLVQQQIPVVQPSILQQLNPKVFLQQQCSPVAMPQRLARSQMLQQSSCHV  
MQQQCCQQLPQIPQQSRYEAIRAIVYSIILQEQQQVQGSIQTQQQQPQQLGQCVSQPQQQ  
SQQQLGQQPQQQQLAQGTFLQPHQIAQLELMTSIALRTLPTMCSVNVPLYRTTTRVPPFGV  
GTGVBAY

>BU-LMW-GS\_PCR#4

MKTFLIFALLAVAATSAIAQMENSHIPGLERPSQQQPLPPQQTTLTHHQQQQPIQQQPHQF  
PQQQPCSQQQPPFSQQQQPPFSQQQQQPILPQQPPFSQHQQPVLQQQIPSVQPSILQQ  
LNPKVFLQQQCSPVAMPQSLARSQMLWQSSYHVMQQQCCRQLPQIPEQSRDAIRAIISY  
SIVLQEQQHGQGLNQPQQQQPQQLGQCVSQPLQQLQQLGQQPQQQQLAHQIAQLEVMTS  
IALRTLPTMCSVNVPLYETTTSVPLGVBGIGVBAY

>BU-LMW-GS\_PCR#7

MKTFLIFALLAVAATSAIAQMENSHIPGLERPSQQQPLPPQQTTLTHHQQQQPIQQQPHQF  
PQQQPCSQQQQQPPLSQQQPPFSQQQQPPFSQQQQPILPQQPPFSQQQQPVLQQQIPF  
VHPSILQQLNPKCEVFLQQQCSPVAMPQSLARSQMLQQSSCHVMQQQCCQQLPQIPEQSR  
EAIRAIVYSVILQEQQQVQGSIQTQQQQPQQLGQCVSQPQQQSQQQLGQQPQQQQLAQGT  
FLQPHQIAQLEVMTPIALRTLPTMCSVNVSLYRTTTRVPPFGVGTGVBAY

>BU-LMW-GS\_PCR#16

MKTFLIFALLAVAATSAIAQMENSHIPGLERPSQQQLPPFSQQLPPFSQQQQPVLPQQPF  
FSQQQQQPILPQQPPFSQQQQPVLLQQQIPFVHPSILQQLNPCCKVFLQQQCSPVAMPQSL  
ARSQMLQQSSCHVMQQQCCQQLPQIPQQSRYEAIRAIVYSIILQEQQQVQGSIQSQQQQP  
QQLGQCVSQPQQQSQQQLGQQPQQQQLAQGTFLQPHQIAQLEVMTSIALRTLPTMCRVNV  
PLYRTTTSVPPFGVAGVGAY

>BU-LMW-GS\_PCR#38

MKTFLIFALLAVAATSAIAQMENSHIPGLEKPSQQQPLPQQLPFFSQQQQPVLPQQPPFS  
QQQQQPILPQQPPFSQQQQPVLLQQQIPFVHPSILQQLNPCCKVFLQQQCSPVAMPQSLAR  
SQMLQQSSCHVMQQQCCQQLPQIPQQSRYEAIRAIVYSIILQEQQQVQGSIQTQQQQPQQ  
LGQCVSQPQQQSQQQLGQQPQQQQLAQGTFLQPHQIAQLEVMTSIALRTLPTMCRVNVSL  
YRTTTRVPPFGVGTGVGGY

>BU-LMW-GS\_PCR#46

MKTFLIFALLAVAATSAIAQMENSHIPGLERPSQQQPLPPQOTLTHHQQQQPIQQQPHQF  
PQQQPCSQQQQQPPLSQQQQPPFSQQQQPILPQQPPFSQQQQPVLLQQQIPFVHPSILQQ  
LNPCCKVFLQQQCSPVAMPQSLARSQMLQQSSCHVMQQQCCQQLPQIPQQSRYEAIRAIVY  
SIILQEQQQVQGSIQTQQQQPQQLGQCVSQPQQQSQQQLGQQPQQQQLAQGTFLQPHQIA  
QLEVMTSIALRTLPTMCRVNVSLYRTTTRVPPFGVGTGVGGY

>BU-LMW-GS\_PCR#47

MKTFLIFALLAVAATSAIAQMENSHIPGLERPSQQQPLPPQOTLTHHQQQQPIQQQPHQF  
PQQQPCSQQQQQPPLSQQQQPPFSQQQQPVLPQQPPFSQQQQQPILPQQPPFSQQQQPVLP  
LQQQIPFVHPSILQQLNPCCKVFLQQQCSPVAMPQSLARSQMLQQSSCHVMQQQCCQQLPQ  
IPQQSRYEAIRAIVYSIILQEQQQVQGSIQTQQQQPQQLGQCVSQPQQQSQQQLGQQPQQ  
QQLAQGTFLQPHQIAQLELMTSIALRTLPTMCRVNVPLYRTTTRVPPFGVGTGVGGY

>BU-LMW-GS\_PCR#49

MKTFLIFALLAVAATSAIAQMENSHIPGLEKPSQQQPLPQQTLSSHQQQQQPVQQQPQPF  
PQQQPCSQQQQPPLSQQQQPPFSQQQPPFSQQRQQPVLPQQQILFVHPSILQQLNPCCKVFL  
LQQQCSPVAMPQSLARSQMLQQSSCHVMQQQCCRQLLQIPQQSRYEAIRAIYSIILQEQQ  
QQVQGSIQTQQQQPQELGQCVSQPQQQSQQQLGQQPQQQQLAQGTFLQPHQIAQLEVMTS  
IALRTLPTMCRVNVPLYRTTTSVPPFGVAGVGAY

>BU-LMW-GS\_PCR#51

MKTFLIFALLAVAATSAIAQMENSHIPGLEKPSQQQPLPQQTLSSHQQQQQPVQQQPQPF  
PQQQPCSQQQQPPLSQQQLPFFSQQQPPFSQQQQPVLPQQQILFVHPSILQQLNPCCKVFL  
QQQCSPVAMPQSLARSQMLQQSSCHVMQQQCCQQLLQIPQQSRYEAIRAIYSIILQEQQ  
QVQGSIQTQQQQPQELGQCVSQPQQQSQQQLGQQPQQQQLAQGTFLQPHQIARLEVMTSI  
ALRTLPTMCRVNVPLYRTTTSVPPFGVAGVGAY

>BU-LMW-GS\_PCR#52

MKTFLIFALLAVAATSAIAQMENSHIPGLEKPSQQQPLPQQTLSSHQQQQQPVQQQPQPF  
PQQQPCSQQQQPPLSQQQQPILPQQPPFSQQQQPVLPQQQILFVHPSISQQLNPCCKVFL  
QQQCSPVAMPQSLARSQMLQQSSCHVMQQQCCQQLLQIPQQSRYEAIRAIYSIILQEQQ  
QVQGSIQTQQQQPQELGQCVSQPQQQSQQQLGQQPQQQQLAQGTFLQPHQIAQLEVMTSI  
ALRTLPTMCRVNVPLYRTTTSVPPFGVAGVGAY
