# Supplementary material
Source: PubMed Central journal article supplement (PMC4285749)
Supplement: pr500809b_si_004.pdf [file pr500809b_si_004.pdf]

Supplemental File 4. Sequences of the predominant proteins in 2-DE spots identified by MS/MS. For spots 2c and 2d, sequences of both the predominant protein and the purinin are provided.

gi|224589270 (spots 1a,1c)

MATTLATDVRLSIAHQTRFALRLASTISSNPKSAASNAAFSPVSLHSALSLAAGAGSATRDQLVATLGTGE  
VEGLHALAEQVVQFVLADASSAGGPRVAFANGVFVDASLLLKPSFQELAVCKYKAETQSVDFQTKAAEVTTQ  
VNSWVEKVTSGRIKNILPSGSVDNNTTKLVLANALYFKGAWTDQFDSYGTKNDFYLLDGSSVQTPFMSSMDD  
DQYISSSDGLKVLKLPYKQGGDNRFQSMYILLPEAPGGLSLLAEKLSAEPDFLERHIPRQRVAIRQFKLPKF  
KISFGIEASDLLKCLGLQLPFSDEADFSEMVDSPMPQGLRVSSVFHQAFVEVNEQGTEAAASTAIKMVPQQA  
RPPSVMDFIADHPFLFLLREDISGVVLFMGHVVNPLRSL

BU\_serpin#2 (spots 1b,1d)

MATTLATDVRLSIAHQTRFALRLASTISSNPKSAASNAVFSPVSLHVALSLAAGAGSATRDQLVTTLGTGE  
VEGLHALAEQVVQFVLADASSAGGPHVAFANGVFVDASLLLKPSFQELAVCKYKAETQSVDFQTKAAEVTAQ  
VNSWVEKVTSGRIKDILPSGSVDNNTTKLVLANALYFKGAWTDQFDSYGTKNDFYLLPDGSSVQTPFMSSMDD  
QYLSDDGLKVLKLPYKQGGDKRQFSMYILLPEAPGGLSNLAEKLSAEPDFLERHIPRQRVALRQFKLPKFK  
ISFETEASDLLKCLGLQLPFSNEADFSEMVDSPMAHGLRVSSVFHQAFVEVNEQGTEAAASTAIKMALLQAR  
PPSVMDFIADHPFLFLLREDISGVVLFMGHVVNPLSS

gi|475621781 (spots 1e,1g)

MATTLATDVRLSIAHQTRFAFRLASAISSNPSTVNNAAFSPVSLHVALSLITAGAGGATRNLAAATLGE  
VEGLHALAEQVVQFVLADASNIGGPRVAFANGVFVDASLQLKPSFQELAVCKYKAEAQSVDFQTKAAEVTAQ  
VNSWVEKVTGLIKDILPAGSIDNNTTLVLGNALYFKGAWTDQFDPRAQSDDFYLLDGSSIQTPFMYSSEE  
QYISSSDGLKVLKLPYKQGGDKRQFSMYILLPEALSGLWSLAEKLSAEPDFLEQHIPRQKVALRQFKLPKFK  
ISLGIASDLLKCLGLQLPFGAEADLSEMVDSPMAQNLIISSIFHKAFVEVNETGTEAAATTIAKVVLRQAP  
PPSVLDFIVDHPFLFLIREDTSGVVLFIGHVVNPLSS

gi|871551 (spot 1f)

MATTLATDVRLSIAHQTRFALRLASTISSNPKSAASNAAFSPVSLYSALSLAAGAGSATRDQLVATLGT  
GKVEGLHALAEQVVQFVLADASSSTGGSACRFANGVFVDASLLLKPSFQEIIVCKYKAETQSVDFQTKAAE  
VTTQVNSWVEKVTSGRIKDILPPGSIDNNTTKLVLANALYFKGAWTEQFDSYGTKNDFYLLDGSSVQTPF  
MSSMDDQYLLSSDGLKVLKLPYKQGGDNRFQFMYILLPEAPGGLSLLAEKLSAEPDFLERHIPRQRVALR  
QFKLPKFKISFGIEASDLLKCLGLQLPFGDEADFSEMVDSPMAQNLIISSIFHKAFVEVNETGTEAAAST  
AIKMVLQQAARPPSVMDFIADHPFLFLVREDISGVVLFMGHVVNPLSS

BU\_purin#3 (spots 2a,2e)

MKKFLVLAALIVVAATTTAAEPFTAFRSAWEPQHPSPEHQPTPQPQEHVPVHQKLNPCRDALLQCCSPVADM  
SFLRSQVVQHSSCLVMWEQCCQQLKAIPKQSRCEAIHNVVHAIILQQQQQLVQATSTQPQQQQQQGQQQQGQ  
LGSSQPQQQTQLDQGWIAVIGTWVIQTIPAMCDVHVPPYCYTTIISPSDVTTDMGGY

BU\_purin#2 (spots 2b,2d)

MKKFLVLAALIVIAATTTAAEPFTAFRIASEPQHPSPEQQPTLQPQEHVPVHQKLNPCRDALLHQCS  
SFLRSQVVQHSSCLVMWEQCCQQLKAIPKQSRCEAIHNVVHAIILQQQQLVQGTSTQPQQQQQQGQQEHGQ  
GSSQPQHQQQQQLDQGWIAVIGTWVIQTVAMPVHVPPYCYTTIISPSDVTTDMGGY

RS\_UWI\_15510 (spot 2c)

gsqqqrarsslvsimpGLTIGDTPVNLLELDSTHGKIWIHDYVGNVYVILFVSHPGDFTPVCTTELAAMANY  
AKEFEKRGVKLLGISCDVQSHKEWTKDIEAYKAGSKVTYPIMADPDRSAIKQLNMVDPDEKDAEQLP  
LHIVGPDKKVLSFLYPSCTGRNMDEVVRAVDSLLTAAKHKVPANWKPGEVVIAPGVSDDAEAKMFPQG  
FETADLPSSKGYLRFTKVacvrassaparlllavcvvvvrayfcggtcrffckstsvselcmctvtlslsc  
vfffagvscvrspvypcvgrllkkkkk

BU\_purin#1 (spot 2c)

MKKFLVLAALIVVAATTTAAEPFTAFRTAWEPHPHPSPEQQPTPQPQEQPVVHQKLNPCRDALLQCCSPVADM  
SFLRSQVVQHSSCLVMWEQCCQQLKAIPKQSRCEAIHNVVHAIIVLQQQQQLVQGI STQPQQQQQQGQQQQGQ  
GSSQPQQQTQLDQGWIAVIGTWVIQTIPAMCDVHVPPYCYTTIISPSIDVTTDMGGY

gi|475538570 (spot 2d)

MSRGSAGYDRHITIFSPEGRLYQVEYAFKAVKSAGVTSIGVRGKDSVCVVTQKKVPDKLLDDTSITHLF  
SITKYTGLLATGLTADARSLVSQARNEAAEFKRWGYEMPVDVLAKWIADKAQIYTTQHAYMRPLGVVAMV  
LGYDEEKNAQLFKCDPAGHFFGHKATSAGLKEQEAINFLEKKMKDSPQFTYDETVOIAIASALQSVLQEDF  
KATEIEVGVVRKEDRVFRSLTTEEIDQHLTAISERD

gi|56480630 (spot 3a)  
SGPWWCYPGQAFQVPALPGCRPLLKLCNQSQVPEAVLRDCCQQLADI SEWCRCGALYSMLDSMYKEHGVSE  
GQAGTGAFPSRREVVKLTAA SITAVCRLPIVVDASGDGAYVCKDVAAYPDA

gi|253783731 (spot 3b)  
TGPYCYAGMGLPINPLEGCREYVAQQTGCGISISGSAVSTEPGNTPRDRCCCKELYDASQHCRCCEAVRYFIGRR  
SDPNSSVLKDLPGCPREPQRDFAKVLVTPGHCVNMTVHNAPYCLGLDI

gi|134034637 (spots 3c, 3d)  
SGPWSWCDPATGYKVSALTGCRAMVKLQCVGSQVPEAVLRDCCQQLADINNEWCRCDLSSMLRSVYQELGV  
REGKEVLPGCRKEVMKLTAA SVPEVCKVPIPNPSGDRAGVCYWAAYPDA

gi|123956 (spot 3e)  
MASKSSITHLLLA AVLVS VFAAAAATGPYCYPGMGLPSNPLEGCREYVAQQTGCGVIGVSPVSTEPGNTF  
RDRCCCKELYDASQHCRCCEAVRYFIGRTSDPNSGVLKDLPGCPREPQRDFAKVLVTPGHCVNMTVHNTPYC  
LGLDI

gi|54778511 (spot 3f)  
SGPWWCYPGYAFKVPALPGCRPVLLKLCNQSQVPEAVLRECCQQLADI SEWCRCGALYSMLDSMYKEHGVQE  
GQAGTGAFPSRREVVKLTAA SITAVCKLPIVIDASGDGAYVCKGVAAYPDA

gi|123958 (spot 3g)  
MASKSNCVLLLLAAVLVS IFAAVAAIGNEDCTPWWSTLITPLPSCRDYVEQQACRIETPGSPYLAKQQCCGEL  
ANIPQQCRCQALRYFMGPKSRPDQSGLMELPGCPREVQMDVFRILVTPGYCNLTTVHNTPYCLAMEESQWS

gi|123957 (spots 3h, 3i)  
MACKSSCSLLLLAAVLLSVLAAASASGSCVPGVAFRTNLLPHCRDYVLQQTGTFTPGSKLPEWMTSASIYS  
PGPKYLAKLYCCQELAEISQQCRCEALRYFIALPVPSPQVDPDRSGNVGESGLIDLPGCPREMOWDFVRLLLVA  
PGQCNLATIHNVRYCPAVEQPLWI

gi|390979705 (spots 4a, 4b, 4c)  
MATRGRATIPLLFLLGTSLLFAAAVSASHDEEEDRRGGRS LQRCVQRCQQDRPRYSHARCVQECRDDQQQH  
RHEQEEQGRGHGRHGEGEREEEEQGRGRGRRGQGEREEEEQGRGRGRRGEGEGERDEEHGDGRRPYVFGPRSFRI  
IRSDHGFVKALRPFDEVSRLLRGIRNYRVAIMEVNPRAFVVPGLTDADGVGYVAQGEGLTVIENGEKRSYT  
VRQGDVIVAPAGS IMHLANTDGRKLVIAKILHTISVPGKFQYFSAKPLLASLSKRVLTAALKTSDERLGS  
LGSRQGEKEEKSISIVRASEEQRLRELRRQASEGDQGHWWPLPPFRGDSRDTFNLLEQRPKIANRHGRLYEA  
DARSFHALAQH DVRVAVANITPGSMTAPYLNTQSFKLAVVLEGEGEVEIVCPHLGRD SERREQE H GKGRWRS  
EEEEDDRRQRRRGSGSESEEEQDQORYETVRARVSRGSAFVVPVPPGHPVVEIASRGS SNLQVVCFEINAER  
NERVWLAGRNNVIAKLDDPAQELAFGRPAREVQEVFRAKDQQDEG FVAGPEQQQEHEHGRDRRRGDRGRGDEA  
VEAFLRMATAAL

RS\_UWI\_15518 (spot 4d)  
ELASSTMATRARVTIPLLLGTSLLFAAAVSASHDEEEDRRGGHSLQQCVQRCQQDRPRYSHARCVQECRG  
DQQQHGRHEQEEQGRGRGRHGEGEREEEEQGGGRGRHGEGEREEEEEGRGRGRHGEGEREEHGRHEQGRGRGE  
GERDEEQGSRRPYVFGPRNFRSIIIRSDHGFVKALRPFDEVSRLLRGIRNYRVAIMEVNPRAFVVPGLTDAD  
GVGYVAQGEGLTVIENGEKRSYTVRQGDVIVAPAGS IMHLANTDGRKLVIAKILHTISVPGRFQYFSAKPL  
LLASLSKRVLRAALKTSDEQLGRLLGRRQGEKEESRSISIIIRASEEQRLREL SRQASEGGQGHWWPLPPFRGD  
SRDTFNLLEQRPKIANRHGRLYQADARSFHALAQH DVRVAVANITPGSMTAPYLNTQSFKLAVVLEGEGEVE  
IVCPHLGRD SERREH GKGRWSEEEEEDDRRQRRRGSGSESESEEEQDQORYETVRARVSRGSAFVVPVPPGHPV  
VEISSSQGSSNLQVVCFEINAERNERVWLAGRNNVIAKLDSPAQELTFGRPAREVQEVFRAKDQQDEG FVAG  
PEQQSHEQE QERGD RRRGDRGRGDDAVGAF LRMATGAFGCMATVEVWVGAGARAVELDLYGVCYCVVVRTY  
AGVEMRVARARYDDASYQPTYQQGMSMSIHKIQWALRSSSKKKKX

gi|475609166 (spots 5a, 5b, 5c)  
MKTMFILALLALAASTAI AQLETIC SQFGQCQHHQQLGQQQLLDQMPCVAFVQHQCSPVRTPFQTRGEO  
HSSCQTVQHCCRQLVQIPEQARCKAIQSVEEAI IQQQPQQQWNEPQQEAHLKSMRMSLQTLPSMCNIYVPV  
QCQQQQQLGRQQQQQLQEQLKPCATFLQHQC RPMTVPFPHTPVQKPTSCQNVQSQCCRQLAQIPEQFRCQAI  
HNVVESIRQQQHHQPQQEVQLEGLRMSLHTLPSMCKIYIPVQCPATTTTPYSITMTASYTDGTC
